# Supplementary material
Source: Springer Nature journal article supplement (https://www.springermedizin.de/resource/supplementary/12913_2008_889_MOESM1_ESM.pdf/9536220)

## Education and Training

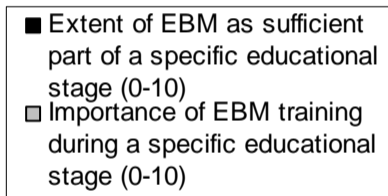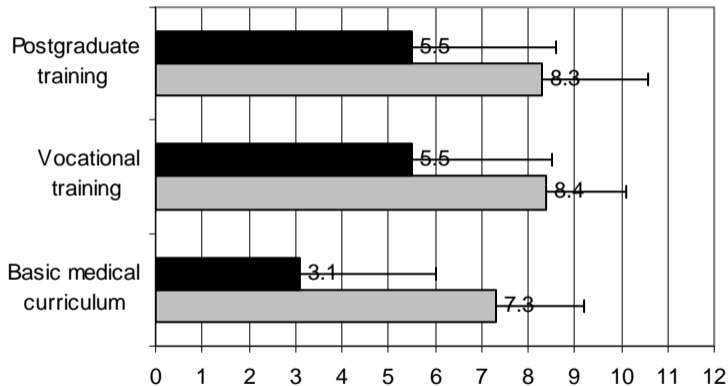

Supplement: MOESM1 [file 9536220]
